# Supplementary material for: Hemoglobin LjGlb1-1 is involved in nodulation and regulates the level of nitric oxide in the Lotus japonicus–Mesorhizobium loti symbiosis
Source: PubMed Central journal article supplement (PMC5014168; doi:10.1093/jxb/erw290), 2016-07-21
Supplement: supp_erw290_supplementary_tables_S1_S3_figures_S1_S4.pdf [file supp_erw290_supplementary_tables_S1_S3_figures_S1_S4.pdf]

**Table S1.** *Growth and nodulation phenotype of WT plants and wild-type homozygous siblings (M5 seeds) from mutant plants*

Plant length is expressed in centimeters and the number of ITs per centimeter of root. Values are means  $\pm$  SE ( $n=60$  for plant length and nodule number;  $n=10-20$  for ITs). Means denoted by the same letter do not significantly differ ( $P=0.05$ ) based on the Duncan's multiple range test.

|               | <b>WT</b>        | <b>A102V w/w</b> | <b>E127K w/w</b> |
|---------------|------------------|------------------|------------------|
| Plant length  | 14.3 $\pm$ 0.5 a | 12.8 $\pm$ 0.8 a | 13.5 $\pm$ 0.4 a |
| Nodule number | 6.8 $\pm$ 0.2 a  | 6.6 $\pm$ 0.2 a  | 6.3 $\pm$ 0.3 a  |
| Incipient ITs | 2.9 $\pm$ 0.1 a  | 2.5 $\pm$ 0.2 a  | 2.5 $\pm$ 0.2 a  |
| Long ITs      | 32.0 $\pm$ 1.4 a | 28.4 $\pm$ 1.0 a | 28.8 $\pm$ 1.3 a |
| Total ITs     | 35.0 $\pm$ 1.4 a | 30.9 $\pm$ 1.1 a | 31.3 $\pm$ 1.4 a |

**Table S2.** Growth parameters of non-nodulated *LjGlb1-1* mutant plants, and derived wild-type homozygous siblings, supplied with combined nitrogen

Plants were grown on Fåhraeus medium supplemented with 1.5 mM NH<sub>4</sub>NO<sub>3</sub> for three weeks. Lengths are expressed in centimeters and weights in grams. Means ( $\pm$  SE,  $n=9-12$ ) denoted by the same letter do not significantly differ ( $P=0.05$ ) based on the Duncan's multiple range test.

|              | <b>WT</b>          | <b>A102V</b>       | <b>E127K</b>       | <b>96642</b>       | <b>A102V (w/w)</b> | <b>E127K (w/w)</b> |
|--------------|--------------------|--------------------|--------------------|--------------------|--------------------|--------------------|
| Shoot length | 4.68 $\pm$ 0.09 a  | 4.33 $\pm$ 0.20 ab | 3.29 $\pm$ 0.24 c  | 3.86 $\pm$ 0.15 b  | 4.69 $\pm$ 0.17 a  | 4.56 $\pm$ 0.12 a  |
| Shoot weight | 29.83 $\pm$ 1.19 a | 27.00 $\pm$ 1.65 a | 20.67 $\pm$ 1.73 b | 26.31 $\pm$ 0.87 a | 30.11 $\pm$ 1.67 a | 29.89 $\pm$ 1.11 a |
| Root length  | 5.37 $\pm$ 0.21 a  | 4.13 $\pm$ 0.23 b  | 2.00 $\pm$ 0.33 c  | 3.73 $\pm$ 0.22 b  | 5.40 $\pm$ 0.18 a  | 5.09 $\pm$ 0.14 a  |
| Root weight  | 29.25 $\pm$ 1.04 a | 23.89 $\pm$ 2.21 b | 12.67 $\pm$ 0.87 c | 24.54 $\pm$ 1.53 b | 29.78 $\pm$ 1.19 a | 27.56 $\pm$ 1.31 a |
| Leaf number  | 4.92 $\pm$ 0.15 a  | 4.11 $\pm$ 0.31 b  | 2.56 $\pm$ 0.45 c  | 3.92 $\pm$ 0.14 b  | 4.89 $\pm$ 0.11 a  | 4.78 $\pm$ 0.15 a  |

**Table S3.** *Effect of SNP application to roots on nodulation of WT plants*

Seedlings were inoculated with *M. loti* MAFF303099 DsRed and grown on nitrogen-free Fåhraeus medium for four weeks. The numbers of ITs are expressed per centimeter of root. Means ( $\pm$  SE,  $n= 9-11$ ) denoted by different letters significantly differ ( $P=0.05$ ) based on the Student's *t*-test.

|               | <b>Control</b>   | <b>SNP</b>       |
|---------------|------------------|------------------|
| Incipient ITs | 3.6 $\pm$ 0.4 a  | 10.5 $\pm$ 0.7 b |
| Long ITs      | 25.5 $\pm$ 2.1 a | 6.6 $\pm$ 0.7 b  |
| Total ITs     | 29.1 $\pm$ 2.1 a | 17.2 $\pm$ 1.2 b |



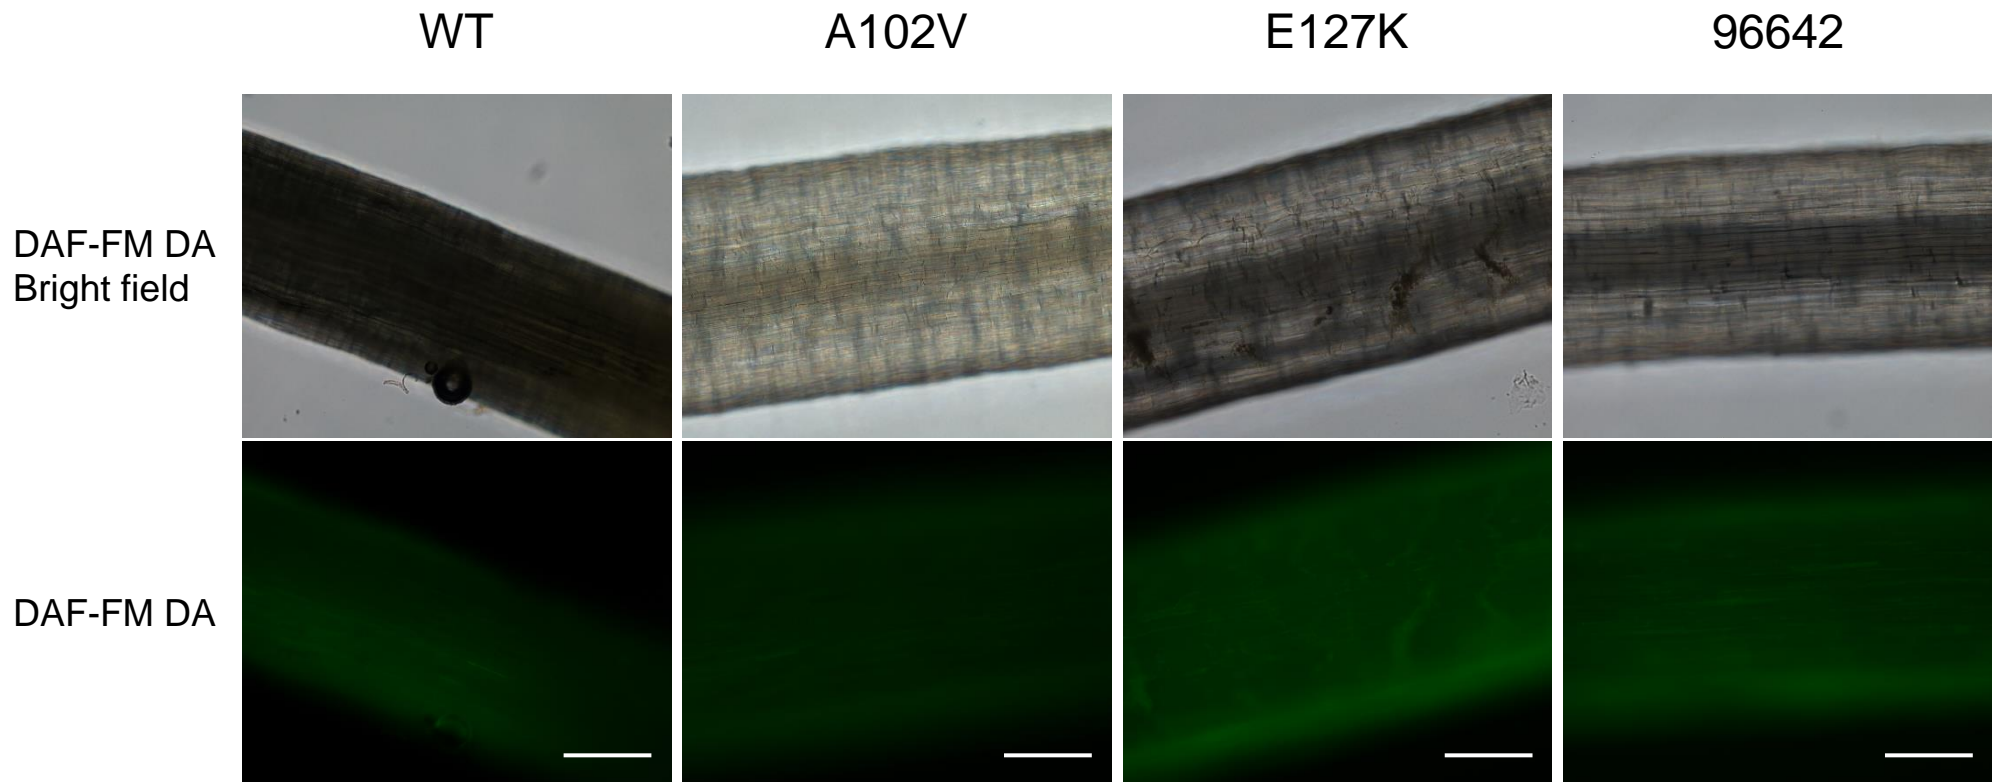

**Figure S2. Inhibition of NO-associated fluorescence by cPTIO in roots of WT and mutant plants.** The figure shows representative epifluorescence and bright-field images of roots after 1-h incubation with 20  $\mu$ M DAF-FM DA combined or not with 3 mM cPTIO. Bars, 200  $\mu$ m.

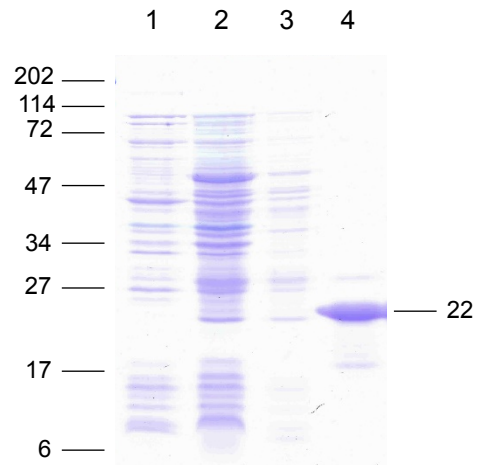

**Figure S3: Purification of wild-type recombinant LjGlb1-1.** SDS-gels (12.5%) stained with Coomassie blue. Lanes (5  $\mu$ g protein): 1, preinduced culture; 2, induced with 0.25 mM IPTG; 3, after ammonium sulfate (30-75%) fractionation; 4, after Ni-affinity chromatography. Molecular mass markers (kDa) are shown on the left. Similar results were obtained for the mutated versions A102V and E127K.

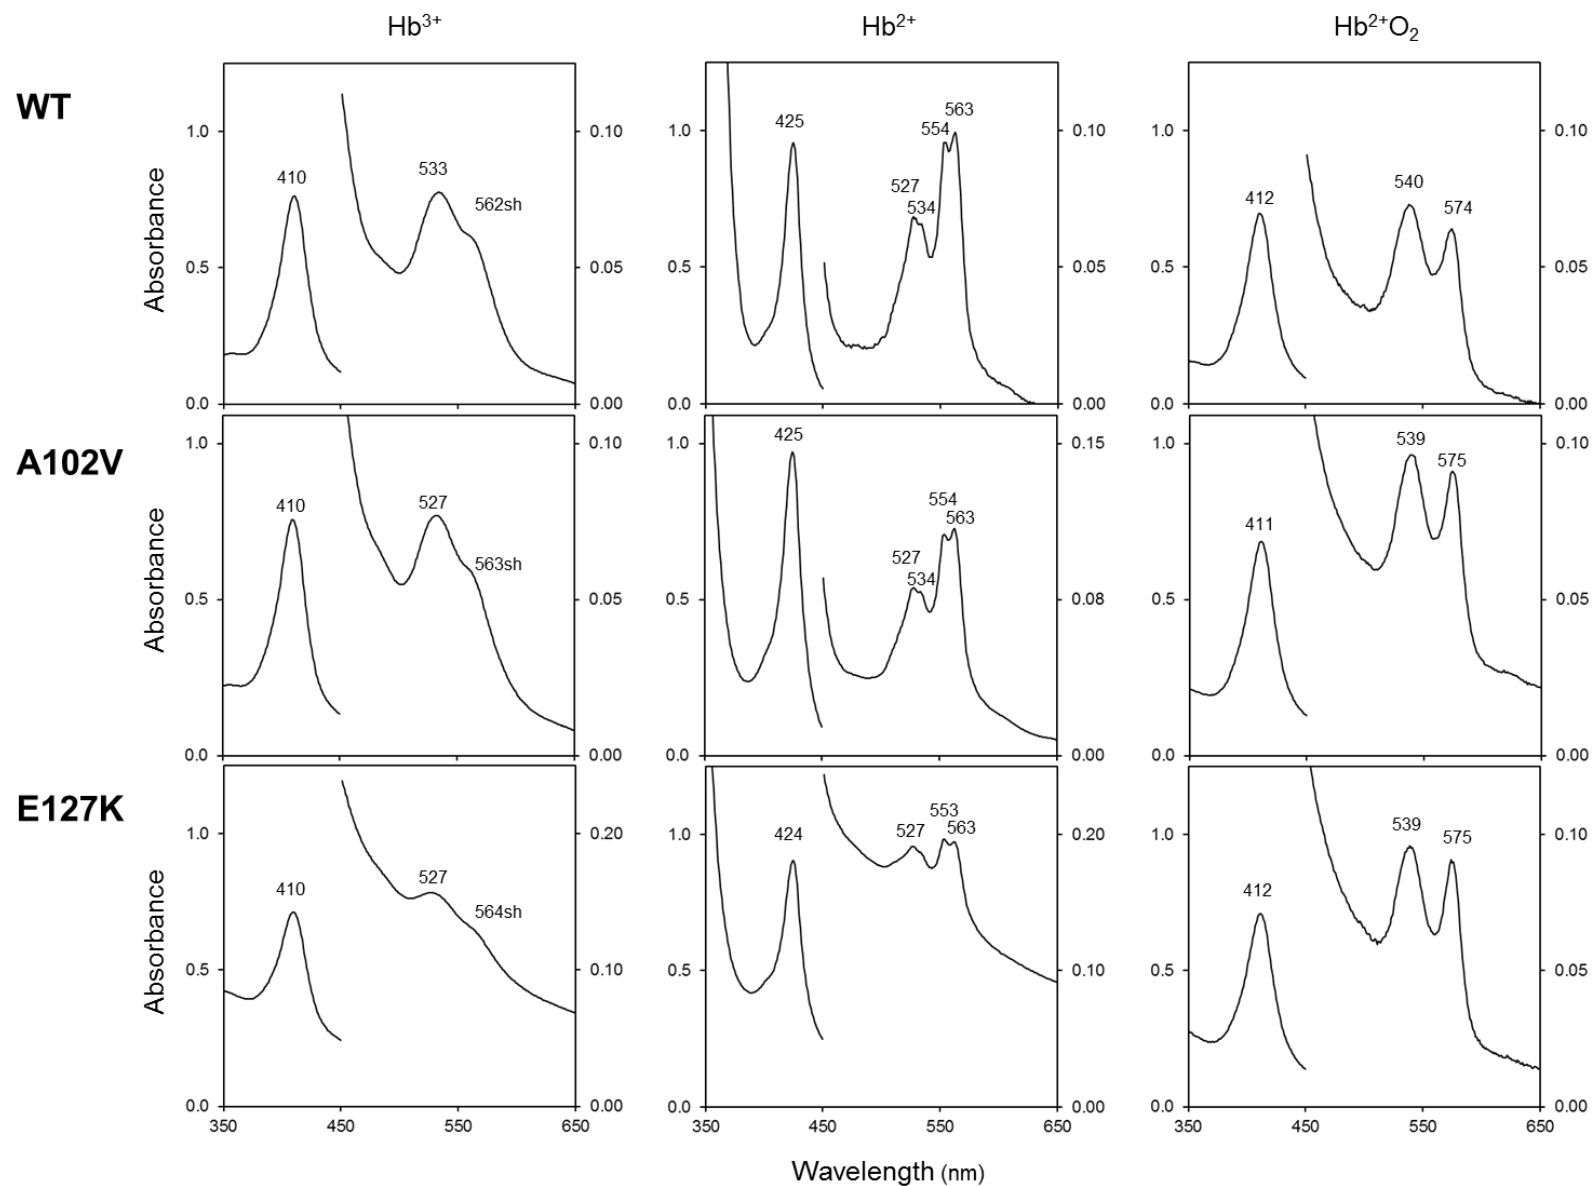

**Figure S4: Representative Soret-visible spectra of recombinant WT, A102V, and E127K proteins.** These were produced in *E. coli* and purified by ammonium sulfate fractionation and metal-affinity chromatography. The spectra of the ferric (Hb<sup>3+</sup>), deoxyferrous (Hb<sup>2+</sup>), and oxyferrous (Hb<sup>2+</sup>O<sub>2</sub>) proteins were obtained with 50  $\mu$ M protein in 50 mM potassium phosphate buffer (pH 7.0). The spectra show relevant peaks and shoulders (sh) in nm.
